# Supplementary material
Source: publisher figshare collection journal article supplement (https://gsajournals.figshare.com/articles/dataset/_/7045148)
Supplement: Supplementary file 1 [file 1]

## Sheet: 384-spot-array
Supplementary Material, Table S2. Quantification of relative binding of CEC-1 and CEC-6 to histone peptide arrays. For each of 384 peptide spots, the histone peptide amino acid range and combination of post-translational modifications are indicated. The raw intensity and calculated relative activity are also shown. See Materials and Methods for details.
							CeCEC-1-6His		CeCEC6-6His		CeCEC-1-6His		CeCEC6-6His
Peptide No.	Location	Name	Mod 1	Mod 2	Mod 3	Mod 4	|Activity (array rep1)|	|Activity (array rep2)|	|Activity (array rep1)|	|Activity (array rep2)|	Raw Intensity (array rep1)	Raw Intensity (array rep2)	Raw Intensity (array rep1)	Raw Intensity (array rep2)
1	A1	H3 1-19	unmod				0.0385812	0.0541381	0.00194151	0.0043684	0.0770609	0.0919952	0.0329218	0.0352734
2	A2	H3 1-19	R2me2s				0.0410703	0.0423149	0.00376168	0.00497512	0.0794504	0.0806452	0.0346855	0.0358613
3	A3	H3 1-19	R2me2a				0.0547604	0.0715619	0.00861546	0	0.0925926	0.108722	0.0393886	0.0293945
4	A4	H3 1-19	R2Citr				0.0373366	0.0640946	0	0	0.0758662	0.101553	0.0194004	0.0258671
5	A5	H3 1-19	T3P				0.0354698	0.0578718	0.0043684	0	0.0740741	0.0955794	0.0352734	0.0258671
6	A6	H3 1-19	K4me1				0.0441817	0.0535159	0	0	0.0824373	0.0913978	0.0111699	0.0241035
7	A7	H3 1-19	K4me2				0.0479154	0.0877411	0	0.0098289	0.0860215	0.124253	0.0252792	0.0405644
8	A8	H3 1-19	K4me3				0.06285	0.0255134	0	0	0.100358	0.0645161	0.0176367	0.0205761
9	A9	H3 1-19	K4ac				0.0348475	0.0497822	0	0	0.0734767	0.0878136	0.0305702	0.00411523
10	A10	H3 1-19	R8me2s				0.0765401	0.0597386	0.00922218	0.000121344	0.113501	0.0973716	0.0399765	0.0311581
11	A11	H3 1-19	R8me2a				0.0728065	0.0796515	0.0152894	0.0231768	0.109916	0.116487	0.0458554	0.0534979
12	A12	H3 1-19	R8Citr				0.0441817	0.0410703	0	0.0207499	0.0824373	0.0794504	0.0235156	0.0511464
13	A13	H3 1-19	K9me1				0.0348475	0.0597386	0.0262104	0.0231768	0.0734767	0.0973716	0.0564374	0.0534979
14	A14	H3 1-19	K9me2				0.0479154	0.0392035	0.330178	0.177891	0.0860215	0.0776583	0.35097	0.20341
15	A15	H3 1-19	K9me3				0.0466708	0.0329807	0.560126	0.580148	0.0848268	0.0716846	0.57378	0.59318
16	A16	H3 1-19	K9ac				0.0217797	0.0354698	0	0	0.0609319	0.0740741	0.0246914	0.0188125
17	A17	H3 1-19	S10P				0.0410703	0.00622277	0.0116491	0.0043684	0.0794504	0.0459976	0.042328	0.0352734
18	A18	H3 1-19	T11P				0.0329807	0.00248911	0.00194151	0	0.0716846	0.0424134	0.0329218	0.0293945
19	A19	H3 1-19	K14ac				0.0522713	0.0323584	0	0.0158961	0.0902031	0.0710872	0.00646678	0.0464433
20	A20	H3 1-19	R2me2s	T3P			0.0690728	0.0261357	0.0158961	0.0116491	0.106332	0.0651135	0.0464433	0.042328
21	A21	H3 1-19	R2me2s	K4me1			0.0429371	0.0273802	0	0.0177163	0.0812425	0.0663082	0.0282187	0.0482069
22	A22	H3 1-19	R2me2s	K4me2			0.0441817	0.0230243	0	0.0158961	0.0824373	0.0621266	0.0305702	0.0464433
23	A23	H3 1-19	R2me2s	K4me3			0	0.0360921	0	0	0.0400239	0.0746714	0.0299824	0.0270429
24	A24	H3 1-19	R2me2s	K4ac			0.0354698	0.0261357	0	0.00497512	0.0740741	0.0651135	0.0199882	0.0358613
25	B1	H3 1-19	R2me2a	T3P			0.0199129	0.0367144	0	0	0.0591398	0.0752688	0.0235156	0.021164
26	B2	H3 1-19	R2me2a	K4me1			0.0398258	0.0510268	0	0.00376168	0.0782557	0.0890084	0.0293945	0.0346855
27	B3	H3 1-19	R2me2a	K4me2			0.0255134	0.0472931	0.0104356	0	0.0645161	0.0854241	0.0411523	0.0164609
28	B4	H3 1-19	R2me2a	K4me3			0.0510268	0.0311139	0	0	0.0890084	0.0698925	0.021164	0.0305702
29	B5	H3 1-19	R2me2a	K4ac			0.029247	0.0329807	0.00558185	0.00254823	0.0681004	0.0716846	0.0364491	0.0335097
30	B6	H3 1-19	R2Citr	T3P			0.0286248	0.0808961	0	0.0043684	0.067503	0.117682	0.0293945	0.0352734
31	B7	H3 1-19	R2Citr	K4me1			0.0591164	0.0584941	0	0.000728067	0.0967742	0.0961768	0.0152851	0.031746
32	B8	H3 1-19	R2Citr	K4me2			0.0491599	0.0541381	0	0	0.0872162	0.0919952	0.0182246	0.0217519
33	B9	H3 1-19	R2Citr	K4me3			0.0379589	0.0572495	0	0.0231768	0.0764636	0.0949821	0.0282187	0.0534979
34	B10	H3 1-19	R2Citr	K4ac			0.0379589	0.056005	0.000728067	0.0256037	0.0764636	0.0937873	0.031746	0.0558495
35	B11	H3 1-19	T3P	K4me1			0.0535159	0.0553827	0.0165028	0.00315496	0.0913978	0.09319	0.0470312	0.0340976
36	B12	H3 1-19	T3P	K4me2			0.0136901	0.0504045	0	0.00618857	0.0531661	0.088411	0.0194004	0.037037
37	B13	H3 1-19	T3P	K4me3			0.0373366	0.0255134	0	0.0158961	0.0758662	0.0645161	0.0235156	0.0464433
38	B14	H3 1-19	T3P	K4ac			0.0143124	0.0267579	0	0	0.0537634	0.0657109	0.0276308	0.0246914
39	B15	H3 1-19	R2me2s	T3P	K4me1		0.0398258	0.0423149	0.000728067	0.0043684	0.0782557	0.0806452	0.031746	0.0352734
40	B16	H3 1-19	R2me2s	T3P	K4me2		0.0217797	0.0261357	0.00618857	0	0.0609319	0.0651135	0.037037	0.0299824
41	B17	H3 1-19	R2me2s	T3P	K4me3		0.0304916	0.0286248	0	0.0104356	0.0692951	0.067503	0.0246914	0.0411523
42	B18	H3 1-19	R2me2s	T3P	K4ac		0.0410703	0.033603	0	0.000728067	0.0794504	0.072282	0.0199882	0.031746
43	B19	H3 1-19	R2me2a	T3P	K4me1		0.0323584	0	0.00315496	0.0207499	0.0710872	0.0322581	0.0340976	0.0511464
44	B20	H3 1-19	R2me2a	T3P	K4me2		0.0497822	0.0149347	0.000728067	0.0104356	0.0878136	0.0543608	0.031746	0.0411523
45	B21	H3 1-19	R2me2a	T3P	K4me3		0.0186683	0.0230243	0	0.00922218	0.057945	0.0621266	0.0241035	0.0399765
46	B22	H3 1-19	R2me2a	T3P	K4ac		0.0161792	0.018046	0.0098289	0.00800874	0.0555555	0.0573477	0.0405644	0.0388007
47	B23	H3 1-19	R8me2s	K9me1			0.051649	0.00808961	0.0171096	0.0098289	0.0896057	0.0477897	0.047619	0.0405644
48	B24	H3 1-19	R8me2s	K9me2			0.0665837	0.0385812	0.182138	0.108725	0.103943	0.0770609	0.207525	0.13639
49	C1	H3 1-19	R8me2s	K9me3			0.0609832	0.0640946	0.575294	0.574688	0.0985663	0.101553	0.588477	0.587889
50	C2	H3 1-19	R8me2s	K9ac			0.033603	0.0348475	0.00376168	0.0098289	0.072282	0.0734767	0.0346855	0.0405644
51	C3	H3 1-19	R8me2s	S10P			0.0441817	0.0392035	0.00133479	0	0.0824373	0.0776583	0.0323339	0.0276308
52	C4	H3 1-19	R8me2s	T11P			0.0572495	0.051649	0.00679529	0.00376168	0.0949821	0.0896057	0.0376249	0.0346855
53	C5	H3 1-19	R8me2a	K9me1			0.0317362	0.0472931	0.018323	0.0128625	0.0704898	0.0854241	0.0487948	0.0435038
54	C6	H3 1-19	R8me2a	K9me2			0.0616055	0.0808961	0.324718	0.149982	0.0991637	0.117682	0.345679	0.176367
55	C7	H3 1-19	R8me2a	K9me3			0.067206	0.0734287	0.551025	0.341706	0.10454	0.110514	0.564962	0.36214
56	C8	H3 1-19	R8me2a	K9ac			0.0342253	0.0472931	0	0	0.0728793	0.0854241	0.0235156	0.0229277
57	C9	H3 1-19	R8me2a	S10P			0.0360921	0.0510268	0	0	0.0746714	0.0890084	0.0170488	0.0152851
58	C10	H3 1-19	R8me2a	T11P			0.0236465	0.0541381	0	0.00376168	0.062724	0.0919952	0.0164609	0.0346855
59	C11	H3 1-19	R8Citr	K9me1			0.044804	0.0553827	0	0.00133479	0.0830346	0.09319	0.0246914	0.0323339
60	C12	H3 1-19	R8Citr	K9me2			0.0510268	0.0379589	0.0880961	0.079602	0.0890084	0.0764636	0.116402	0.108172
61	C13	H3 1-19	R8Citr	K9me3			0.0342253	0.0510268	0.307123	0.245844	0.0728793	0.0890084	0.32863	0.269253
62	C14	H3 1-19	R8Citr	K9ac			0.0267579	0.0392035	0.00194151	0.00315496	0.0657109	0.0776583	0.0329218	0.0340976
63	C15	H3 1-19	R8Citr	S10P			0.0267579	0.0280025	0.00254823	0.0104356	0.0657109	0.0669056	0.0335097	0.0411523
64	C16	H3 1-19	R8Citr	T11P			0.0441817	0.0416926	0	0.0158961	0.0824373	0.0800478	0.0205761	0.0464433
65	C17	H3 1-19	K9me1	S10P			0.0317362	0.018046	0.000728067	0.0104356	0.0704898	0.0573477	0.031746	0.0411523
66	C18	H3 1-19	K9me1	T11P			0.0261357	0.0286248	0.00254823	0.00740201	0.0651135	0.067503	0.0335097	0.0382128
67	C19	H3 1-19	K9me1	K14ac			0.0174238	0.0248911	0.00740201	0.018323	0.0567503	0.0639187	0.0382128	0.0487948
68	C20	H3 1-19	K9me2	S10P			0.0286248	0.0174238	0	0.0134692	0.067503	0.0567503	0.00646678	0.0440917
69	C21	H3 1-19	K9me2	T11P			0.0155569	0.033603	0.00497512	0.000728067	0.0549582	0.072282	0.0358613	0.031746
70	C22	H3 1-19	K9me2	K14ac			0.0410703	0.0143124	0.49278	0.351414	0.0794504	0.0537634	0.508524	0.371546
71	C23	H3 1-19	K9me3	S10P			0.0168015	0	0	0.0043684	0.0561529	0.0388291	0.0188125	0.0352734
72	C24	H3 1-19	K9me3	T11P			0.0423149	0.00311139	0	0	0.0806452	0.0430107	0.0299824	0.0288066
73	D1	H3 1-19	K9me3	K14ac			0.0472931	0.0734287	0.752457	0.503701	0.0854241	0.110514	0.760141	0.519106
74	D2	H3 1-19	K9ac	S10P			0.0385812	0.0280025	0.00497512	0.00497512	0.0770609	0.0669056	0.0358613	0.0358613
75	D3	H3 1-19	K9ac	T11P			0.0392035	0.0255134	0	0.018323	0.0776583	0.0645161	0.0293945	0.0487948
76	D4	H3 1-19	K9ac	K14ac			0.0522713	0.0410703	0	0	0.0902031	0.0794504	0.0117578	0.0276308
77	D5	H3 1-19	S10P	T11P			0.0553827	0.0342253	0	0.00922218	0.09319	0.0728793	0.0176367	0.0399765
78	D6	H3 1-19	S10P	K14ac			0.0541381	0.0255134	0	0	0.0919952	0.0645161	0.021164	0.0293945
79	D7	H3 1-19	T11P	K14ac			0.0603609	0.067206	0.00254823	0	0.0979689	0.10454	0.0335097	0.0288066
80	D8	H3 1-19	R8me2s	K9me1	S10P		0.0553827	0.0385812	0.0122558	0.0146827	0.09319	0.0770609	0.0429159	0.0452675
81	D9	H3 1-19	R8me2s	K9me2	S10P		0.0323584	0.0273802	0.000728067	0.00800874	0.0710872	0.0663082	0.031746	0.0388007
82	D10	H3 1-19	R8me2s	K9me3	S10P		0.0423149	0.0429371	0	0	0.0806452	0.0812425	0.0270429	0.0199882
83	D11	H3 1-19	R8me2s	K9ac	S10P		0.0441817	0.0578718	0	0.018323	0.0824373	0.0955794	0.0258671	0.0487948
84	D12	H3 1-19	R8me2s	K9me1	T11P		0.0504045	0.0348475	0	0.00740201	0.088411	0.0734767	0.00823045	0.0382128
85	D13	H3 1-19	R8me2s	K9me2	T11P		0.0479154	0.056005	0.00740201	0.0116491	0.0860215	0.0937873	0.0382128	0.042328
86	D14	H3 1-19	R8me2s	K9me3	T11P		0.0479154	0.0317362	0	0	0.0860215	0.0704898	0.0188125	0.0276308
87	D15	H3 1-19	R8me2s	K9ac	T11P		0.0348475	0.0373366	0	0	0.0734767	0.0758662	0.0282187	0.0229277
88	D16	H3 1-19	R8me2a	K9me1	S10P		0.0298693	0.0423149	0.0134692	0	0.0686977	0.0806452	0.0440917	0.0293945
89	D17	H3 1-19	R8me2a	K9me2	S10P		0.0174238	0.0311139	0	0.0098289	0.0567503	0.0698925	0.0164609	0.0405644
90	D18	H3 1-19	R8me2a	K9me3	S10P		0.018046	0.0280025	0	0.014076	0.0573477	0.0669056	0.0305702	0.0446796
91	D19	H3 1-19	R8me2a	K9ac	S10P		0.0342253	0.018046	0.0146827	0.00861546	0.0728793	0.0573477	0.0452675	0.0393886
92	D20	H3 1-19	R8me2a	K9me1	T11P		0.00248911	0.0454263	0.0110423	0.0110423	0.0424134	0.083632	0.0417401	0.0417401
93	D21	H3 1-19	R8me2a	K9me2	T11P		0.0261357	0.0373366	0	0.00922218	0.0651135	0.0758662	0.0141093	0.0399765
94	D22	H3 1-19	R8me2a	K9me3	T11P		0.022402	0.0105787	0.00376168	0.00558185	0.0615293	0.0501792	0.0346855	0.0364491
95	D23	H3 1-19	R8me2a	K9ac	T11P		0.074051	0.00746733	0.0207499	0.0165028	0.111111	0.0471923	0.0511464	0.0470312
96	D24	H3 1-19	R8me2a	K9me1	S10P	T11P	0.0192906	0.0130678	0.0110423	0.00922218	0.0585424	0.0525687	0.0417401	0.0399765
97	E1	H3 1-19	R8me2a	K9me2	S10P	T11P	0.0161792	0.0236465	0	0.0122558	0.0555555	0.062724	0.015873	0.0429159
98	E2	H3 1-19	R8me2a	K9me3	S10P	T11P	0.0398258	0.0392035	0	0.00315496	0.0782557	0.0776583	0.026455	0.0340976
99	E3	H3 1-19	R8me2a	K9ac	S10P	T11P	0.06285	0.0479154	0	0	0.100358	0.0860215	0.0129336	0.0182246
100	E4	H3 1-19	R2me2s	K4me1	R8me2s		0.0479154	0.0311139	0	0	0.0860215	0.0698925	0.0241035	0.0199882
101	E5	H3 1-19	R2me2s	K4me2	R8me2s		0.0591164	0.0479154	0.0043684	0.00254823	0.0967742	0.0860215	0.0352734	0.0335097
102	E6	H3 1-19	R2me2s	K4me3	R8me2s		0.0186683	0.06285	0.00254823	0.0152894	0.057945	0.100358	0.0335097	0.0458554
103	E7	H3 1-19	R2me2s	K4ac	R8me2s		0.0535159	0.051649	0	0	0.0913978	0.0896057	0.0276308	0.0176367
104	E8	H3 1-19	R2me2a	K4me1	R8me2a		0.033603	0.0385812	0.00254823	0.00800874	0.072282	0.0770609	0.0335097	0.0388007
105	E9	H3 1-19	R2me2a	K4me2	R8me2a		0.0273802	0.0392035	0	0	0.0663082	0.0776583	0.0252792	0.0252792
106	E10	H3 1-19	R2me2a	K4me3	R8me2a		0.0304916	0.0323584	0.00133479	0	0.0692951	0.0710872	0.0323339	0.0270429
107	E11	H3 1-19	R2me2a	K4ac	R8me2a		0.029247	0.044804	0	0	0.0681004	0.0830346	0.0305702	0.0194004
108	E12	H3 1-19	R2me2s	K4me1	K9me1		0.0665837	0.018046	0.0134692	0.024997	0.103943	0.0573477	0.0440917	0.0552616
109	E13	H3 1-19	R2me2s	K4me2	K9me1		0.0286248	0.0242688	0.00861546	0.00922218	0.067503	0.0633214	0.0393886	0.0399765
110	E14	H3 1-19	R2me2s	K4me3	K9me1		0.0435594	0.0242688	0.000121344	0	0.0818399	0.0633214	0.0311581	0.0288066
111	E15	H3 1-19	R2me2s	K4ac	K9me1		0.033603	0.022402	0.00740201	0.00254823	0.072282	0.0615293	0.0382128	0.0335097
112	E16	H3 1-19	R2me2a	K4me1	K9me2		0.0267579	0.0441817	0.254338	0.266472	0.0657109	0.0824373	0.277484	0.289242
113	E17	H3 1-19	R2me2a	K4me2	K9me2		0.0311139	0.0267579	0.177891	0.223395	0.0698925	0.0657109	0.20341	0.247501
114	E18	H3 1-19	R2me2a	K4me3	K9me2		0.0186683	0.0304916	0.0929499	0.124499	0.057945	0.0692951	0.121105	0.151675
115	E19	H3 1-19	R2me2a	K4ac	K9me2		0.0186683	0.0367144	0.0680743	0.0802087	0.057945	0.0752688	0.0970018	0.10876
116	E20	H3 1-19	R2me2s	K4me1	K9me3		0.00622277	0.0230243	0.52615	0.45577	0.0459976	0.0621266	0.540858	0.472663
117	E21	H3 1-19	R2me2s	K4me2	K9me3		0.0273802	0.0149347	0.449096	0.394491	0.0663082	0.0543608	0.466196	0.413286
118	E22	H3 1-19	R2me2s	K4me3	K9me3		0.029247	0.00373366	0.231889	0.137241	0.0681004	0.0436081	0.255732	0.164021
119	E23	H3 1-19	R2me2s	K4ac	K9me3		0.0578718	0.0528936	0.218541	0.205194	0.0955794	0.0908005	0.242798	0.229865
120	E24	H3 1-19	R2me2a	K4me1	K9ac		0.044804	0.0304916	0.014076	0.0322776	0.0830346	0.0692951	0.0446796	0.0623163
121	F1	H3 1-19	R2me2a	K4me2	K9ac		0.033603	0.0242688	0	0	0.072282	0.0633214	0.00764256	0.0276308
122	F2	H3 1-19	R2me2a	K4me3	K9ac		0.0348475	0.0491599	0	0	0.0734767	0.0872162	0.0270429	0.0288066
123	F3	H3 1-19	R2me2a	K4ac	K9ac		0.0255134	0.0317362	0	0	0.0645161	0.0704898	0.0229277	0.0205761
124	F4	H3 1-19	K4me1	R8me2s	K9me1		0.0286248	0.0311139	0.00558185	0.00679529	0.067503	0.0698925	0.0364491	0.0376249
125	F5	H3 1-19	K4me2	R8me2s	K9me1		0.029247	0.0435594	0	0	0.0681004	0.0818399	0.0270429	0.0199882
126	F6	H3 1-19	K4me3	R8me2s	K9me1		0.0597386	0.0373366	0.0043684	0.0146827	0.0973716	0.0758662	0.0352734	0.0452675
127	F7	H3 1-19	K4ac	R8me2s	K9me1		0.0541381	0.0547604	0.00497512	0	0.0919952	0.0925926	0.0358613	0.0258671
128	F8	H3 1-19	K4me1	R8me2a	K9me1		0.0280025	0.0522713	0.0134692	0.0152894	0.0669056	0.0902031	0.0440917	0.0458554
129	F9	H3 1-19	K4me2	R8me2a	K9me1		0.040448	0.0311139	0	0.0262104	0.078853	0.0698925	0.0176367	0.0564374
130	F10	H3 1-19	K4me3	R8me2a	K9me1		0.0317362	0.0460485	0	0.0043684	0.0704898	0.0842294	0.026455	0.0352734
131	F11	H3 1-19	K4ac	R8me2a	K9me1		0.0616055	0.0267579	0	0.00133479	0.0991637	0.0657109	0.026455	0.0323339
132	F12	H3 1-19	K4me1	R8me2s	K9me2		0.0808961	0.0497822	0.150589	0.181531	0.117682	0.0878136	0.176955	0.206937
133	F13	H3 1-19	K4me2	R8me2s	K9me2		0.0796515	0.0765401	0.145735	0.0504793	0.116487	0.113501	0.172252	0.079953
134	F14	H3 1-19	K4me3	R8me2s	K9me2		0.0460485	0.0485376	0.0516928	0.0262104	0.0842294	0.0866189	0.0811287	0.0564374
135	F15	H3 1-19	K4ac	R8me2s	K9me2		0.0603609	0.0205352	0.0535129	0.0365247	0.0979689	0.0597371	0.0828924	0.0664315
136	F16	H3 1-19	K4me1	R8me2a	K9me2		0.0616055	0.0398258	0.174251	0.153622	0.0991637	0.0782557	0.199882	0.179894
137	F17	H3 1-19	K4me2	R8me2a	K9me2		0.0286248	0.0392035	0.156049	0.188205	0.067503	0.0776583	0.182246	0.213404
138	F18	H3 1-19	K4me3	R8me2a	K9me2		0.0186683	0.0192906	0.0547264	0.136634	0.057945	0.0585424	0.0840682	0.163433
139	F19	H3 1-19	K4ac	R8me2a	K9me2		0.040448	0.0174238	0.0826356	0.0656474	0.078853	0.0567503	0.111111	0.0946502
140	F20	H3 1-19	K4me1	R8me2s	K9me3		0.051649	0.0273802	0.371435	0.454556	0.0896057	0.0663082	0.390946	0.471487
141	F21	H3 1-19	K4me2	R8me2s	K9me3		0.0267579	0.0199129	0.27436	0.397525	0.0657109	0.0591398	0.296884	0.416226
142	F22	H3 1-19	K4me3	R8me2s	K9me3		0.0161792	0.029247	0.196699	0.226429	0.0555555	0.0681004	0.221634	0.250441
143	F23	H3 1-19	K4ac	R8me2s	K9me3		0.0373366	0.0211574	0.172431	0.217328	0.0758662	0.0603345	0.198119	0.241623
144	F24	H3 1-19	K4me1	R8me2a	K9me3		0.0479154	0.0435594	0.330785	0.413906	0.0860215	0.0818399	0.351558	0.432099
145	G1	H3 1-19	K4me2	R8me2a	K9me3		0.0510268	0.033603	0.399951	0.34292	0.0890084	0.072282	0.418577	0.363316
146	G2	H3 1-19	K4me3	R8me2a	K9me3		0.0497822	0.0485376	0.441209	0.203373	0.0878136	0.0866189	0.458554	0.228101
147	G3	H3 1-19	K4ac	R8me2a	K9me3		0.0771624	0.085252	0.370222	0.174251	0.114098	0.121864	0.389771	0.199882
148	G4	H3 1-19	K4me1	R8me2s	K9ac		0.0553827	0.0454263	0.014076	0.00740201	0.09319	0.083632	0.0446796	0.0382128
149	G5	H3 1-19	K4me2	R8me2s	K9ac		0.040448	0.0230243	0.000121344	0.0158961	0.078853	0.0621266	0.0311581	0.0464433
150	G6	H3 1-19	K4me3	R8me2s	K9ac		0.0441817	0.0379589	0	0	0.0824373	0.0764636	0.0141093	0.0282187
151	G7	H3 1-19	K4ac	R8me2s	K9ac		0.0504045	0.0304916	0	0	0.088411	0.0692951	0.026455	0.0229277
152	G8	H3 1-19	K4me1	R8me2a	K9ac		0.0398258	0.0379589	0	0.0098289	0.0782557	0.0764636	0.00705467	0.0405644
153	G9	H3 1-19	K4me2	R8me2a	K9ac		0.0547604	0.040448	0	0	0.0925926	0.078853	0.0246914	0.0276308
154	G10	H3 1-19	K4me3	R8me2a	K9ac		0.0423149	0.0261357	0	0.0098289	0.0806452	0.0651135	0.0241035	0.0405644
155	G11	H3 1-19	K4ac	R8me2a	K9ac		0.0566272	0.0497822	0	0.0043684	0.0943847	0.0878136	0.0241035	0.0352734
156	G12	H3 1-19	R2me2s	K4me1	R8me2s	K9me1	0.0280025	0	0	0	0.0669056	0.0364397	0.0170488	0.0299824
157	G13	H3 1-19	R2me2s	K4me2	R8me2s	K9me1	0.0311139	0.029247	0.00133479	0.00254823	0.0698925	0.0681004	0.0323339	0.0335097
158	G14	H3 1-19	R2me2s	K4me3	R8me2s	K9me1	0.0466708	0.0056005	0	0.00861546	0.0848268	0.0454002	0.021164	0.0393886
159	G15	H3 1-19	R2me2s	K4ac	R8me2s	K9me1	0.0323584	0.0280025	0	0	0.0710872	0.0669056	0.0241035	0.0246914
160	G16	H3 1-19	R2me2a	K4me1	R8me2s	K9me1	0.0342253	0.0136901	0.0158961	0.0134692	0.0728793	0.0531661	0.0464433	0.0440917
161	G17	H3 1-19	R2me2a	K4me2	R8me2s	K9me1	0.0230243	0.0367144	0.00376168	0.00194151	0.0621266	0.0752688	0.0346855	0.0329218
162	G18	H3 1-19	R2me2a	K4me3	R8me2s	K9me1	0.0255134	0.00497822	0	0	0.0645161	0.0448029	0.0170488	0.0276308
163	G19	H3 1-19	R2me2a	K4ac	R8me2s	K9me1	0.00186683	0.0304916	0.00618857	0.014076	0.041816	0.0692951	0.037037	0.0446796
164	G20	H3 1-19	R2me2s	K4me1	R8me2s	K9me2	0.0348475	0.0348475	0.158476	0.193666	0.0734767	0.0734767	0.184597	0.218695
165	G21	H3 1-19	R2me2s	K4me2	R8me2s	K9me2	0.0348475	0.0367144	0.101444	0.102051	0.0734767	0.0752688	0.129336	0.129924
166	G22	H3 1-19	R2me2s	K4me3	R8me2s	K9me2	0.0348475	0.00808961	0.0462322	0.0407717	0.0734767	0.0477897	0.0758377	0.0705467
167	G23	H3 1-19	R2me2s	K4ac	R8me2s	K9me2	0.0441817	0.0186683	0.0571533	0.0340978	0.0824373	0.057945	0.0864197	0.0640799
168	G24	H3 1-19	R2me2a	K4me1	R8me2s	K9me2	0.0696951	0.0211574	0.132387	0.0425919	0.106929	0.0603345	0.159318	0.0723104
169	H1	H3 1-19	R2me2a	K4me2	R8me2s	K9me2	0.0771624	0.0566272	0.202767	0.192452	0.114098	0.0943847	0.227513	0.217519
170	H2	H3 1-19	R2me2a	K4me3	R8me2s	K9me2	0.078407	0.0952085	0.0929499	0.112972	0.115293	0.131422	0.121105	0.140506
171	H3	H3 1-19	R2me2a	K4ac	R8me2s	K9me2	0.105787	0.096453	0.122679	0.0474457	0.141577	0.132616	0.149912	0.0770135
172	H4	H3 1-19	R2me2s	K4me1	R8me2s	K9me3	0.0877411	0.0728065	0.782793	0.399951	0.124253	0.109916	0.789536	0.418577
173	H5	H3 1-19	R2me2s	K4me2	R8me2s	K9me3	0.0765401	0.0908525	0.641427	0.384177	0.113501	0.12724	0.652557	0.403292
174	H6	H3 1-19	R2me2s	K4me3	R8me2s	K9me3	0.096453	0.0920971	0.358088	0.181531	0.132616	0.128435	0.378013	0.206937
175	H7	H3 1-19	R2me2s	K4ac	R8me2s	K9me3	0.156192	0.121966	0.27072	0.156656	0.189964	0.157109	0.293357	0.182834
176	H8	H3 1-19	R2me2a	K4me1	R8me2s	K9me3	0.152458	0.0273802	0.587429	0.49096	0.18638	0.0663082	0.600235	0.506761
177	H9	H3 1-19	R2me2a	K4me2	R8me2s	K9me3	0.0939639	0.0858743	0.352627	0.543138	0.130227	0.122461	0.372722	0.557319
178	H10	H3 1-19	R2me2a	K4me3	R8me2s	K9me3	0.0771624	0.0690728	0.216721	0.23735	0.114098	0.106332	0.241035	0.261023
179	H11	H3 1-19	R2me2a	K4ac	R8me2s	K9me3	0.184816	0.0970753	0.12996	0.137847	0.217443	0.133214	0.156966	0.164609
180	H12	H3 1-19	R2me2s	K4me1	R8me2s	K9ac	0.0460485	0.011201	0.000121344	0.00800874	0.0842294	0.0507766	0.0311581	0.0388007
181	H13	H3 1-19	R2me2s	K4me2	R8me2s	K9ac	0.0510268	0.0143124	0.00254823	0.00558185	0.0890084	0.0537634	0.0335097	0.0364491
182	H14	H3 1-19	R2me2s	K4me3	R8me2s	K9ac	0.0354698	0.0230243	0.000121344	0.0146827	0.0740741	0.0621266	0.0311581	0.0452675
183	H15	H3 1-19	R2me2s	K4ac	R8me2s	K9ac	0.0360921	0.022402	0	0.018323	0.0746714	0.0615293	0.0246914	0.0487948
184	H16	H3 1-19	R2me2a	K4me1	R8me2s	K9ac	0.022402	0.00746733	0.00861546	0	0.0615293	0.0471923	0.0393886	0.0305702
185	H17	H3 1-19	R2me2a	K4me2	R8me2s	K9ac	0.0273802	0.00933416	0.00133479	0.00800874	0.0663082	0.0489845	0.0323339	0.0388007
186	H18	H3 1-19	R2me2a	K4me3	R8me2s	K9ac	0.0168015	0.0205352	0	0.00618857	0.0561529	0.0597371	0.0305702	0.037037
187	H19	H3 1-19	R2me2a	K4ac	R8me2s	K9ac	0.0280025	0.0342253	0	0.000121344	0.0669056	0.0728793	0.0146972	0.0311581
188	H20	H3 1-19	R2me2s	K4me1	R8me2a	K9me1	0.0261357	0.00871188	0.00800874	0.0219634	0.0651135	0.0483871	0.0388007	0.0523222
189	H21	H3 1-19	R2me2s	K4me2	R8me2a	K9me1	0.0217797	0.0143124	0	0.00679529	0.0609319	0.0537634	0.021164	0.0376249
190	H22	H3 1-19	R2me2s	K4me3	R8me2a	K9me1	0.0217797	0.0124455	0.00679529	0.00497512	0.0609319	0.0519713	0.0376249	0.0358613
191	H23	H3 1-19	R2me2s	K4ac	R8me2a	K9me1	0.0155569	0.00684505	0.0110423	0.00800874	0.0549582	0.046595	0.0417401	0.0388007
192	H24	H3 1-19	R2me2a	K4me1	R8me2a	K9me1	0.0161792	0.0211574	0.0134692	0.024997	0.0555555	0.0603345	0.0440917	0.0552616
193	I1	H3 1-19	R2me2a	K4me2	R8me2a	K9me1	0.0398258	0.0591164	0	0.00740201	0.0782557	0.0967742	0.0135215	0.0382128
194	I2	H3 1-19	R2me2a	K4me3	R8me2a	K9me1	0.0242688	0.0273802	0.0146827	0.0371314	0.0633214	0.0663082	0.0452675	0.0670194
195	I3	H3 1-19	R2me2a	K4ac	R8me2a	K9me1	0.0348475	0.0186683	0.00315496	0.00558185	0.0734767	0.057945	0.0340976	0.0364491
196	I4	H3 1-19	R2me2s	K4me1	R8me2a	K9me2	0.0423149	0.0609832	0.784007	0.31501	0.0806452	0.0985663	0.790711	0.336273
197	I5	H3 1-19	R2me2s	K4me2	R8me2a	K9me2	0.0703174	0.0833852	0.298629	0.301056	0.107527	0.120072	0.3204	0.322751
198	I6	H3 1-19	R2me2s	K4me3	R8me2a	K9me2	0.0808961	0.0535159	0.177284	0.140274	0.117682	0.0913978	0.202822	0.166961
199	I7	H3 1-19	R2me2s	K4ac	R8me2a	K9me2	0.0877411	0.0752956	0.0656474	0.0917364	0.124253	0.112306	0.0946502	0.119929
200	I8	H3 1-19	R2me2a	K4me1	R8me2a	K9me2	0.0976976	0.0242688	0.402985	0.655988	0.133811	0.0633214	0.421517	0.666667
201	I9	H3 1-19	R2me2a	K4me2	R8me2a	K9me2	0.0771624	0.0678282	0.336246	0.60563	0.114098	0.105137	0.356849	0.617872
202	I10	H3 1-19	R2me2a	K4me3	R8me2a	K9me2	0.0423149	0.0230243	0.0607936	0.163936	0.0806452	0.0621266	0.0899471	0.189888
203	I11	H3 1-19	R2me2a	K4ac	R8me2a	K9me2	0.114499	0.0584941	0.0595801	0.0692877	0.14994	0.0961768	0.0887713	0.0981775
204	I12	H3 1-19	R2me2s	K4me1	R8me2a	K9me3	0.0752956	0.0416926	0.497634	0.399345	0.112306	0.0800478	0.513228	0.417989
205	I13	H3 1-19	R2me2s	K4me2	R8me2a	K9me3	0.0752956	0.0647169	0.679044	0.574688	0.112306	0.102151	0.689006	0.587889
206	I14	H3 1-19	R2me2s	K4me3	R8me2a	K9me3	0.100187	0.0696951	0.254338	0.301056	0.136201	0.106929	0.277484	0.322751
207	I15	H3 1-19	R2me2s	K4ac	R8me2a	K9me3	0.110765	0.105787	0.2058	0.247057	0.146356	0.141577	0.230453	0.270429
208	I16	H3 1-19	R2me2a	K4me1	R8me2a	K9me3	0.0647169	0.0696951	0.671156	0.708166	0.102151	0.106929	0.681364	0.717225
209	I17	H3 1-19	R2me2a	K4me2	R8me2a	K9me3	0.0796515	0.0367144	0.465477	0.623225	0.116487	0.0752688	0.482069	0.634921
210	I18	H3 1-19	R2me2a	K4me3	R8me2a	K9me3	0.0566272	0.040448	0.254945	0.150589	0.0943847	0.078853	0.278072	0.176955
211	I19	H3 1-19	R2me2a	K4ac	R8me2a	K9me3	0.0933416	0.074051	0.137847	0.0201432	0.12963	0.111111	0.164609	0.0505585
212	I20	H3 1-19	R2me2s	K4me1	R8me2a	K9ac	0.0149347	0.0174238	0.0098289	0	0.0543608	0.0567503	0.0405644	0.0288066
213	I21	H3 1-19	R2me2s	K4me2	R8me2a	K9ac	0.0248911	0	0.0128625	0.0171096	0.0639187	0.0394265	0.0435038	0.047619
214	I22	H3 1-19	R2me2s	K4me3	R8me2a	K9ac	0.0248911	0	0	0.0158961	0.0639187	0.0322581	0.0164609	0.0464433
215	I23	H3 1-19	R2me2s	K4ac	R8me2a	K9ac	0.0155569	0.0136901	0	0.00194151	0.0549582	0.0531661	0.0252792	0.0329218
216	I24	H3 1-19	R2me2a	K4me1	R8me2a	K9ac	0.0217797	0.0168015	0.00618857	0.00254823	0.0609319	0.0561529	0.037037	0.0335097
217	J1	H3 1-19	R2me2a	K4me2	R8me2a	K9ac	0.0280025	0.0124455	0.00133479	0.0225701	0.0669056	0.0519713	0.0323339	0.05291
218	J2	H3 1-19	R2me2a	K4me3	R8me2a	K9ac	0.0130678	0.0273802	0.00740201	0	0.0525687	0.0663082	0.0382128	0.026455
219	J3	H3 1-19	R2me2a	K4ac	R8me2a	K9ac	0.0168015	0.0298693	0	0.0134692	0.0561529	0.0686977	0.0194004	0.0440917
220	J4	H3 7-26	unmod				0.018046	0.0329807	0	0.0122558	0.0573477	0.0716846	0.0217519	0.0429159
221	J5	H3 7-26	K14ac				0.00124455	0.0192906	0.0207499	0.00376168	0.0412186	0.0585424	0.0511464	0.0346855
222	J6	H3 7-26	K14ac	S10P			0.067206	0.0572495	0	0.00315496	0.10454	0.0949821	0.0194004	0.0340976
223	J7	H3 7-26	K14ac	T11P			0.0298693	0.0286248	0	0	0.0686977	0.067503	0.0205761	0.0276308
224	J8	H3 7-26	R17me2s				0.0479154	0.040448	0.0104356	0.0098289	0.0860215	0.078853	0.0411523	0.0405644
225	J9	H3 7-26	R17me2a				0.0267579	0.0118233	0.014076	0.00194151	0.0657109	0.0513739	0.0446796	0.0329218
226	J10	H3 7-26	R17Citr				0.0367144	0.0143124	0.0043684	0.0152894	0.0752688	0.0537634	0.0352734	0.0458554
227	J11	H3 7-26	K18ac				0.0304916	0.0261357	0	0.00861546	0.0692951	0.0651135	0.0252792	0.0393886
228	J12	H3 7-26	K14ac	R17me2s			0.0454263	0.0329807	0.00194151	0.0110423	0.083632	0.0716846	0.0329218	0.0417401
229	J13	H3 7-26	K14ac	R17me2a			0.011201	0.0174238	0	0.0098289	0.0507766	0.0567503	0.0288066	0.0405644
230	J14	H3 7-26	K14ac	K18ac			0.044804	0.0354698	0.00800874	0.014076	0.0830346	0.0740741	0.0388007	0.0446796
231	J15	H3 7-26	R17me2s	K18ac			0.0485376	0.0360921	0	0.0171096	0.0866189	0.0746714	0.0223398	0.047619
232	J16	H3 7-26	R17me2a	K18ac			0.044804	0.033603	0	0	0.0830346	0.072282	0.0252792	0.0299824
233	J17	H3 7-26	R17Citr	K18ac			0.0416926	0.0510268	0	0.0316709	0.0800478	0.0890084	0.015873	0.0617284
234	J18	H3 7-26	K14ac	R17me2s	K18ac		0.0342253	0.0161792	0.00376168	0.00315496	0.0728793	0.0555555	0.0346855	0.0340976
235	J19	H3 7-26	K14ac	R17me2a	K18ac		0.0304916	0.00622277	0	0.000121344	0.0692951	0.0459976	0.00823045	0.0311581
236	J20	H3 16-35	unmod				0.0354698	0.0155569	0.00254823	0.0043684	0.0740741	0.0549582	0.0335097	0.0352734
237	J21	H3 16-35	R26me2s				0.0485376	0.0267579	0	0	0.0866189	0.0657109	0.0199882	0.0282187
238	J22	H3 16-35	R26me2a				0.0273802	0.0056005	0	0	0.0663082	0.0454002	0.0241035	0.0229277
239	J23	H3 16-35	R26Citr				0.0423149	0.00435594	0.00497512	0.000121344	0.0806452	0.0442055	0.0358613	0.0311581
240	J24	H3 16-35	K27me1				0.0429371	0.018046	0.0547264	0.00618857	0.0812425	0.0573477	0.0840682	0.037037
241	K1	H3 16-35	K27me2				0.394524	0.427505	0.401165	0.835578	0.418757	0.450418	0.419753	0.840682
242	K2	H3 16-35	K27me3				0.868699	0.912881	1	0.884723	0.873955	0.916368	1	0.888301
243	K3	H3 16-35	K27ac				0.0510268	0.0640946	0	0	0.0890084	0.101553	0.00352734	0.0293945
244	K4	H3 16-35	S28P				0	0.0199129	0	0	0.0322581	0.0591398	0.0241035	0.0293945
245	K5	H3 16-35	R26me2s	K27me1			0.10392	0.120722	0.00740201	0.0522995	0.139785	0.155914	0.0382128	0.0817166
246	K6	H3 16-35	R26me2s	K27me2			0.449284	0.665215	0.229462	0.415119	0.471326	0.678614	0.25338	0.433275
247	K7	H3 16-35	R26me2s	K27me3			0.924082	1	0.508555	0.842859	0.927121	1	0.523809	0.847737
248	K8	H3 16-35	R26me2s	K27ac			0.0304916	0.0479154	0.00254823	0.0213566	0.0692951	0.0860215	0.0335097	0.0517343
249	K9	H3 16-35	R26me2s	S28P			0.0248911	0.0230243	0.00254823	0	0.0639187	0.0621266	0.0335097	0.0223398
250	K10	H3 16-35	R26me2a	K27me1			0.160548	0.089608	0.00497512	0.0353112	0.194146	0.126045	0.0358613	0.0652557
251	K11	H3 16-35	R26me2a	K27me2			0.708774	0.388301	0.27254	0.449096	0.72043	0.412784	0.29512	0.466196
252	K12	H3 16-35	R26me2a	K27me3			0.879278	0.794648	0.765198	0.773693	0.88411	0.802867	0.772487	0.780717
253	K13	H3 16-35	R26me2a	K27ac			0.0186683	0.0261357	0	0.0128625	0.057945	0.0651135	0.0164609	0.0435038
254	K14	H3 16-35	R26me2a	S28P			0.0298693	0.011201	0.0152894	0	0.0686977	0.0507766	0.0458554	0.0229277
255	K15	H3 16-35	R26Citr	K27me1			0.0267579	0.0528936	0	0	0.0657109	0.0908005	0.00999412	0.0299824
256	K16	H3 16-35	R26Citr	K27me2			0.0553827	0.0410703	0.0201432	0.0213566	0.09319	0.0794504	0.0505585	0.0517343
257	K17	H3 16-35	R26Citr	K27me3			0.128811	0.0647169	0.0808154	0.0862759	0.16368	0.102151	0.109347	0.114638
258	K18	H3 16-35	R26Citr	S28P			0	0.0155569	0	0.0146827	0.0334528	0.0549582	0.0176367	0.0452675
259	K19	H3 16-35	K27me1	S28P			0.0136901	0	0	0.0098289	0.0531661	0.0358423	0.00705467	0.0405644
260	K20	H3 16-35	K27me2	S28P			0	0.0323584	0	0	0.0310633	0.0710872	0.0170488	0.0241035
261	K21	H3 16-35	K27me3	S28P			0.00871188	0	0	0.0171096	0.0483871	0.0364397	0.026455	0.047619
262	K22	H3 16-35	K27ac	S28P			0.0105787	0.0136901	0	0.0146827	0.0501792	0.0531661	0.0252792	0.0452675
263	K23	H3 16-35	R26me2s	K27me1	S28P		0.0186683	0.00373366	0	0.00497512	0.057945	0.0436081	0.000587889	0.0358613
264	K24	H3 16-35	R26me2s	K27me2	S28P		0.018046	0.0130678	0	0.0098289	0.0573477	0.0525687	0.0293945	0.0405644
265	L1	H3 16-35	R26me2s	K27me3	S28P		0.0211574	0.00124455	0	0	0.0603345	0.0412186	0.0258671	0.0305702
266	L2	H3 16-35	R26me2s	K27ac	S28P		0.0199129	0.022402	0	0	0.0591398	0.0615293	0.00881834	0.0276308
267	L3	H3 16-35	R26me2a	K27me1	S28P		0.0273802	0.0261357	0	0.0098289	0.0663082	0.0651135	0.0223398	0.0405644
268	L4	H3 16-35	R26me2a	K27me2	S28P		0	0.022402	0	0.00133479	0.0400239	0.0615293	0.00999412	0.0323339
269	L5	H3 16-35	R26me2a	K27me3	S28P		0.00124455	0.0149347	0	0.0158961	0.0412186	0.0543608	0.010582	0.0464433
270	L6	H3 16-35	R26me2a	K27ac	S28P		0	0.0217797	0	0	0.0340502	0.0609319	0.0194004	0.021164
271	L7	H3 26-45	unmod				0.0273802	0.0485376	0.00800874	0.00740201	0.0663082	0.0866189	0.0388007	0.0382128
272	L8	H3 26-45	K36me1				0.0485376	0.0416926	0	0.00254823	0.0866189	0.0800478	0.0188125	0.0335097
273	L9	H3 26-45	K36me2				0.0280025	0.0261357	0.0098289	0.00800874	0.0669056	0.0651135	0.0405644	0.0388007
274	L10	H3 26-45	K36me3				0.0342253	0.0286248	0	0.00558185	0.0728793	0.067503	0.0217519	0.0364491
275	L11	H3 26-45	K36ac				0.0572495	0.0908525	0.00376168	0.00558185	0.0949821	0.12724	0.0346855	0.0364491
276	L12	H4 1-19	unmod				0.0161792	0.00871188	0	0.0213566	0.0555555	0.0483871	0.0205761	0.0517343
277	L13	H4 1-19	S1P				0.029247	0.0186683	0	0	0.0681004	0.057945	0.015873	0.0123457
278	L14	H4 1-19	R3me2s				0.0367144	0.0130678	0	0.00194151	0.0752688	0.0525687	0.0288066	0.0329218
279	L15	H4 1-19	R3me2a				0.0124455	0.0130678	0	0.00254823	0.0519713	0.0525687	0.0194004	0.0335097
280	L16	H4 1-19	K5ac				0.0205352	0.0124455	0	0.00861546	0.0597371	0.0519713	0.0305702	0.0393886
281	L17	H4 1-19	K8ac				0.0360921	0.00622277	0	0.0171096	0.0746714	0.0459976	0.0205761	0.047619
282	L18	H4 1-19	K12ac				0.0329807	0.0136901	0	0.00315496	0.0716846	0.0531661	0.0176367	0.0340976
283	L19	H4 1-19	K16ac				0.0192906	0	0	0	0.0585424	0.0334528	0.0252792	0.0282187
284	L20	H4 1-19	S1P	R3me2s			0.0323584	0.0205352	0.029244	0	0.0710872	0.0597371	0.0593768	0.0235156
285	L21	H4 1-19	S1P	R3me2a			0.0280025	0.00248911	0	0.00558185	0.0669056	0.0424134	0.0123457	0.0364491
286	L22	H4 1-19	S1P	K5ac			0.0136901	0	0.00558185	0.00922218	0.0531661	0.0322581	0.0364491	0.0399765
287	L23	H4 1-19	R3me2s	K5ac			0.0354698	0.00186683	0	0.0146827	0.0740741	0.041816	0.0282187	0.0452675
288	L24	H4 1-19	R3me2s	K8ac			0.0136901	0	0.00315496	0.0043684	0.0531661	0.0340502	0.0340976	0.0352734
289	M1	H4 1-19	R3me2a	K5ac			0.0342253	0.0192906	0	0.0043684	0.0728793	0.0585424	0.0182246	0.0352734
290	M2	H4 1-19	R3me2a	K8ac			0.0230243	0.0597386	0	0.00254823	0.0621266	0.0973716	0.0188125	0.0335097
291	M3	H4 1-19	K5ac	K8ac			0.0298693	0.0304916	0	0.00861546	0.0686977	0.0692951	0.0135215	0.0393886
292	M4	H4 1-19	K8ac	K12ac			0.0118233	0.044804	0	0.0146827	0.0513739	0.0830346	0	0.0452675
293	M5	H4 1-19	K8ac	K16ac			0.0168015	0.044804	0	0.000728067	0.0561529	0.0830346	0.0235156	0.031746
294	M6	H4 1-19	K12ac	K16ac			0.0304916	0.0317362	0	0	0.0692951	0.0704898	0.0293945	0.021164
295	M7	H4 1-19	S1P	R3me2s	K5ac		0.00684505	0.0354698	0	0	0.046595	0.0740741	0.00764256	0.0282187
296	M8	H4 1-19	S1P	R3me2a	K5ac		0.0342253	0.0304916	0.00800874	0	0.0728793	0.0692951	0.0388007	0.0246914
297	M9	H4 1-19	R3me2s	K5ac	K8ac		0.033603	0.0155569	0	0	0.072282	0.0549582	0.0229277	0.0288066
298	M10	H4 1-19	R3me2a	K5ac	K8ac		0.0280025	0.0230243	0	0	0.0669056	0.0621266	0.0205761	0.0282187
299	M11	H4 1-19	K5ac	K8ac	K12ac		0	0.0348475	0	0.0177163	0.0394265	0.0734767	0.00764256	0.0482069
300	M12	H4 1-19	K8ac	K12ac	K16ac		0.00995644	0.00871188	0	0.00497512	0.0495818	0.0483871	0.0129336	0.0358613
301	M13	H4 1-19	S1P	R3me2s	K5ac	K8ac	0.0236465	0.00497822	0	0.0122558	0.062724	0.0448029	0.0258671	0.0429159
302	M14	H4 1-19	S1P	R3me2a	K5ac	K8ac	0.000622277	0.00684505	0	0.0158961	0.0406213	0.046595	0.00881834	0.0464433
303	M15	H4 1-19	R3me2s	K5ac	K8ac	K12ac	0.0261357	0.00933416	0	0.00497512	0.0651135	0.0489845	0.0194004	0.0358613
304	M16	H4 1-19	R3me2a	K5ac	K8ac	K12ac	0.0261357	0	0	0.0116491	0.0651135	0.0394265	0.00881834	0.042328
305	M17	H4 1-19	K5ac	K8ac	K12ac	K16ac	0.0348475	0.0186683	0	0.0165028	0.0734767	0.057945	0.0176367	0.0470312
306	M18	H4 11-30	unmod				0.051649	0.0242688	0	0.00194151	0.0896057	0.0633214	0.00999412	0.0329218
307	M19	H4 11-30	K12ac				0.00808961	0.00684505	0.00194151	0.0104356	0.0477897	0.046595	0.0329218	0.0411523
308	M20	H4 11-30	K16ac				0.0323584	0.00933416	0	0.0146827	0.0710872	0.0489845	0.0135215	0.0452675
309	M21	H4 11-30	R17me2s				0.0510268	0	0.000728067	0.00618857	0.0890084	0.0197133	0.031746	0.037037
310	M22	H4 11-30	R17me2a				0.0248911	0	0	0.0104356	0.0639187	0.0394265	0.0129336	0.0411523
311	M23	H4 11-30	R19me2s				0.00248911	0.00248911	0.00740201	0.00740201	0.0424134	0.0424134	0.0382128	0.0382128
312	M24	H4 11-30	R19me2a				0.022402	0.0105787	0.000121344	0.014076	0.0615293	0.0501792	0.0311581	0.0446796
313	N1	H4 11-30	K20me1				0.029247	0.0056005	0	0	0.0681004	0.0454002	0.0199882	0.0182246
314	N2	H4 11-30	K20me2				0.0136901	0.06285	0	0	0.0531661	0.100358	0.0170488	0.0282187
315	N3	H4 11-30	K20me3				0.0205352	0.0454263	0	0.00740201	0.0597371	0.083632	0.0282187	0.0382128
316	N4	H4 11-30	K20ac				0.029247	0.0311139	0	0.0165028	0.0681004	0.0698925	0.0223398	0.0470312
317	N5	H4 11-30	R24me2a				0.0311139	0.0261357	0	0	0.0698925	0.0651135	0.0229277	0.0299824
318	N6	H4 11-30	R24me2s				0.0323584	0.0510268	0.0274239	0	0.0710872	0.0890084	0.0576132	0.0223398
319	N7	H4 11-30	K12ac	K16ac			0.0323584	0.0392035	0	0	0.0710872	0.0776583	0.0270429	0.0182246
320	N8	H4 11-30	K16ac	R17me2s			0.0435594	0.0143124	0	0.00558185	0.0818399	0.0537634	0.0252792	0.0364491
321	N9	H4 11-30	K16ac	R17me2a			0.0273802	0.00186683	0	0.00922218	0.0663082	0.041816	0.0205761	0.0399765
322	N10	H4 11-30	K16ac	R19me2s			0.0398258	0	0.00922218	0.0104356	0.0782557	0.0244922	0.0399765	0.0411523
323	N11	H4 11-30	K16ac	R19me2a			0.0230243	0.0367144	0	0	0.0621266	0.0752688	0.00646678	0.0235156
324	N12	H4 11-30	K16ac	K20me1			0.0155569	0.00311139	0	0.0165028	0.0549582	0.0430107	0.0194004	0.0470312
325	N13	H4 11-30	K16ac	K20me2			0.033603	0.0236465	0.0128625	0.024997	0.072282	0.062724	0.0435038	0.0552616
326	N14	H4 11-30	K16ac	K20me3			0.029247	0.00684505	0	0	0.0681004	0.046595	0.0223398	0.0305702
327	N15	H4 11-30	K16ac	K20ac			0.0199129	0.0149347	0	0.0152894	0.0591398	0.0543608	0.0217519	0.0458554
328	N16	H4 11-30	K12ac	K16ac	K20me1		0.0304916	0.033603	0	0	0.0692951	0.072282	0.0241035	0.0176367
329	N17	H4 11-30	K12ac	K16ac	K20me2		0.0130678	0.0416926	0	0.0043684	0.0525687	0.0800478	0.0123457	0.0352734
330	N18	H4 11-30	K12ac	K16ac	K20me3		0.018046	0.0124455	0	0	0.0573477	0.0519713	0.0246914	0.0205761
331	N19	H4 11-30	K12ac	K16ac	K20ac		0.00808961	0	0	0	0.0477897	0.0298686	0.0152851	0.0288066
332	N20	H4 11-30	R19me2a	K20me1			0.0485376	0	0.00740201	0.00376168	0.0866189	0.0316607	0.0382128	0.0346855
333	N21	H4 11-30	R19me2a	K20me2			0.0242688	0.0118233	0	0	0.0633214	0.0513739	0	0.00940623
334	N22	H4 11-30	R19me2a	K20me3			0.018046	0	0	0	0.0573477	0.0376344	0.0205761	0.0282187
335	N23	H4 11-30	R19me2a	K20ac			0.0329807	0.00808961	0	0.0134692	0.0716846	0.0477897	0.0282187	0.0440917
336	N24	H4 11-30	R19me2s	K20me1			0.0342253	0	0	0	0.0728793	0.0358423	0.0135215	0.0246914
337	O1	H4 11-30	R19me2s	K20me2			0.0491599	0.0242688	0.00133479	0.00679529	0.0872162	0.0633214	0.0323339	0.0376249
338	O2	H4 11-30	R19me2s	K20me3			0.0429371	0.0454263	0	0.00922218	0.0812425	0.083632	0.021164	0.0399765
339	O3	H4 11-30	R19me2s	K20ac			0.0255134	0.0360921	0	0.00254823	0.0645161	0.0746714	0.0170488	0.0335097
340	O4	H4 11-30	R24me2a	K20me1			0.0192906	0.0261357	0	0	0.0585424	0.0651135	0.00940623	0.0188125
341	O5	H4 11-30	R24me2a	K20me2			0.051649	0.0435594	0	0.00558185	0.0896057	0.0818399	0.0152851	0.0364491
342	O6	H4 11-30	R24me2a	K20me3			0.0267579	0.0186683	0	0.00376168	0.0657109	0.057945	0.0305702	0.0346855
343	O7	H4 11-30	R24me2a	K20ac			0	0.0460485	0.0122558	0.0098289	0.0340502	0.0842294	0.0429159	0.0405644
344	O8	H4 11-30	R24me2s	K20me1			0.0124455	0.00124455	0.00558185	0.014076	0.0519713	0.0412186	0.0364491	0.0446796
345	O9	H4 11-30	R24me2s	K20me2			0.0124455	0.00248911	0	0.0122558	0.0519713	0.0424134	0.0299824	0.0429159
346	O10	H4 11-30	R24me2s	K20me3			0.0186683	0.0491599	0.0219634	0.0322776	0.057945	0.0872162	0.0523222	0.0623163
347	O11	H4 11-30	R24me2s	K20ac			0.0354698	0.00622277	0	0.00376168	0.0740741	0.0459976	0.0282187	0.0346855
348	O12	H2a 1-19	unmod				0.018046	0.00684505	0.00194151	0	0.0573477	0.046595	0.0329218	0.0270429
349	O13	H2a 1-19	S1P				0.0130678	0.0186683	0.00558185	0.0207499	0.0525687	0.057945	0.0364491	0.0511464
350	O14	H2a 1-19	K5ac				0.00186683	0.00186683	0.014076	0.0043684	0.041816	0.041816	0.0446796	0.0352734
351	O15	H2a 1-19	K9ac				0.00311139	0.0118233	0	0.00558185	0.0430107	0.0513739	0.0293945	0.0364491
352	O16	H2a 1-19	K13ac				0.0360921	0	0	0.0213566	0.0746714	0.0334528	0.0152851	0.0517343
353	O17	H2a 1-19	S1P	K5ac			0.0217797	0.00871188	0	0.0456255	0.0609319	0.0483871	0.0152851	0.0752498
354	O18	H2a 1-19	S1P	K9ac			0.00871188	0.00684505	0	0	0.0483871	0.046595	0.0129336	0.0276308
355	O19	H2a 1-19	S1P	K13ac			0.033603	0	0.0116491	0.0098289	0.072282	0.0203106	0.042328	0.0405644
356	O20	H2a 1-19	K5ac	K9ac			0.0211574	0	0.0201432	0.00254823	0.0603345	0.037037	0.0505585	0.0335097
357	O21	H2a 1-19	K5ac	K13ac			0.0155569	0	0	0.00618857	0.0549582	0.0346475	0.0217519	0.037037
358	O22	H2a 1-19	K9ac	K13ac			0.00248911	0.00995644	0	0.0165028	0.0424134	0.0495818	0.0170488	0.0470312
359	O23	H2a 1-19	S1P	K5ac	K9ac		0.0161792	0.00808961	0	0	0.0555555	0.0477897	0.0299824	0.0258671
360	O24	H2a 1-19	S1P	K5ac	K13ac		0.0323584	0.0143124	0.00558185	0.0152894	0.0710872	0.0537634	0.0364491	0.0458554
361	P1	H2a 1-19	S1P	K9ac	K13ac		0.0385812	0.0248911	0	0	0.0770609	0.0639187	0.0135215	0.015873
362	P2	H2a 1-19	K5ac	K9ac	K13ac		0.0174238	0.0429371	0	0.00679529	0.0567503	0.0812425	0.015873	0.0376249
363	P3	H2a 1-19	S1P	K5ac	K9ac	K13ac	0.0616055	0.0504045	0.00618857	0	0.0991637	0.088411	0.037037	0.0205761
364	P4	H2b 1-19	unmod				0.0510268	0.0354698	0	0.00679529	0.0890084	0.0740741	0.0241035	0.0376249
365	P5	H2b 1-19	K5ac				0.022402	0.022402	0	0.029244	0.0615293	0.0615293	0.0182246	0.0593768
366	P6	H2b 1-19	K12ac				0.011201	0.0273802	0	0	0.0507766	0.0663082	0.0199882	0.0282187
367	P7	H2b 1-19	S14P				0.00933416	0.0124455	0	0.0280306	0.0489845	0.0519713	0.026455	0.0582011
368	P8	H2b 1-19	K15ac				0.0329807	0.00933416	0	0.000121344	0.0716846	0.0489845	0.0188125	0.0311581
369	P9	H2b 1-19	K5ac	K12ac			0.0211574	0.0056005	0	0.0219634	0.0603345	0.0454002	0.0235156	0.0523222
370	P10	H2b 1-19	K5ac	S14P			0.0168015	0.0105787	0	0.0213566	0.0561529	0.0501792	0.0299824	0.0517343
371	P11	H2b 1-19	K5ac	K15ac			0.0255134	0.0230243	0	0	0.0645161	0.0621266	0.0282187	0.026455
372	P12	H2b 1-19	K12ac	S14P			0	0.00373366	0.0110423	0.0286373	0.0352449	0.0436081	0.0417401	0.0587889
373	P13	H2b 1-19	K12ac	K15ac			0.0304916	0.00808961	0	0.00800874	0.0692951	0.0477897	0.0223398	0.0388007
374	P14	H2b 1-19	S14P	K15ac			0	0.00373366	0	0.0122558	0.0292712	0.0436081	0.0135215	0.0429159
375	P15	H2b 1-19	K5ac	K12ac	S14P		0.0236465	0.00248911	0	0.0189297	0.062724	0.0424134	0.0246914	0.0493827
376	P16	H2b 1-19	K5ac	K12ac	K15ac		0.0472931	0.00808961	0.00133479	0.00922218	0.0854241	0.0477897	0.0323339	0.0399765
377	P17	H2b 1-19	K5ac	S14P	K15ac		0.0323584	0	0	0.00679529	0.0710872	0.0304659	0.0252792	0.0376249
378	P18	H2b 1-19	K12ac	S14P	K15ac		0.00746733	0	0	0.00376168	0.0471923	0.025687	0.0170488	0.0346855
379	P19	H2b 1-19	K5ac	K12ac	S14P	K15ac	0.00311139	0	0.00861546	0	0.0430107	0.0346475	0.0393886	0.0299824
380	P20		Biotin control				0.00746733	0	0.00376168	0.00800874	0.0471923	0.0340502	0.0346855	0.0388007
381	P21		c-Myc control				0.0261357	0	0	0.00254823	0.0651135	0	0.0246914	0.0335097
382	P22		Negative control				0	0	0	0	0.0358423	0.0400239	0.0293945	0.0252792
383	P23		Background 1				0.00995644	0	0	0.00740201	0.0495818	0.0280765	0.0141093	0.0382128
384	P24		Background 2				0	0	0	0	0.0334528	0.0400239	0.0293945	0.0293945
