# Supplementary material
Source: publisher figshare collection journal article supplement (https://gsajournals.figshare.com/articles/dataset/_/7045148)
Supplement: Supplementary file 1 [file 1]

## **Supplemental Information for Saltzman *et al.* 2018**

### **Multiple histone methyl-lysine readers ensure robust development and germline immortality in *C. elegans***

#### **File S1:**

Figures S1-S7

Table S1

Supplemental Literature Cited

#### **File S2:**

Table S2

# A

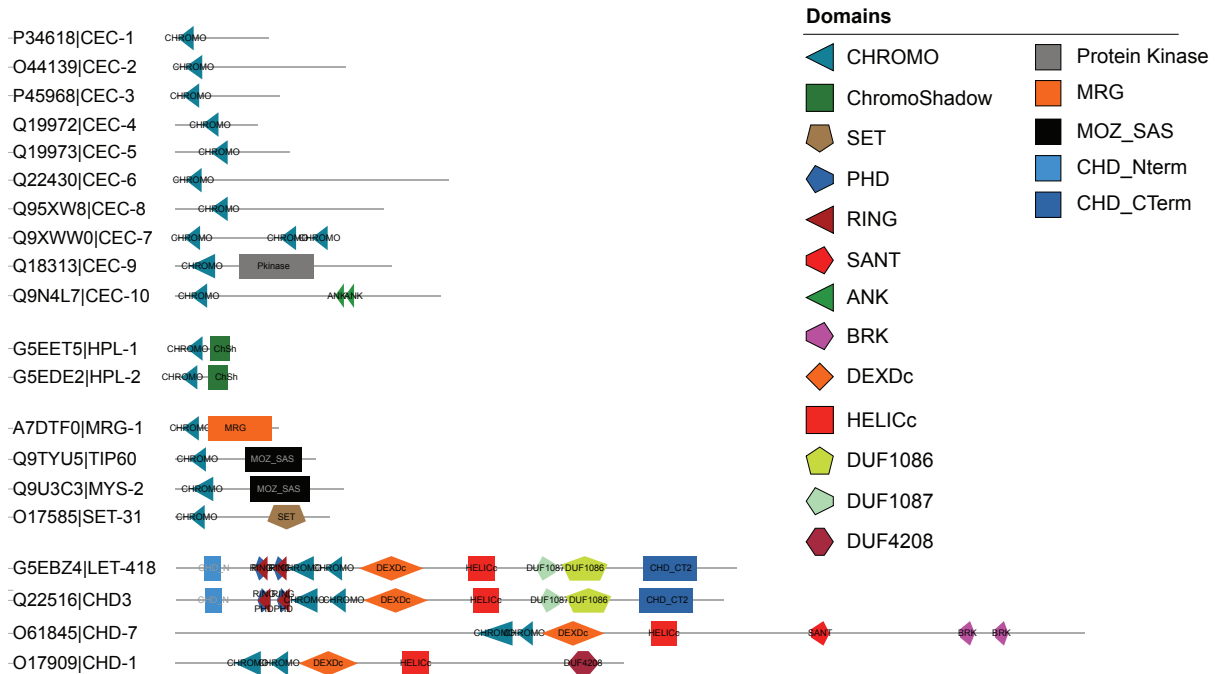

# B

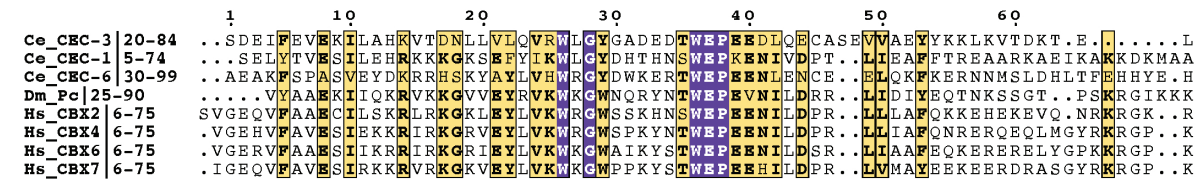

**Figure S1. Chromo domain-containing proteins in *C. elegans*.**

(A) Diagrams of 20 *C. elegans* proteins annotated in the SMART (Simple Modular Architecture Research Tool) (LETUNIC and BORK 2018) database as containing a chromo domain. Proteins vary in domain architecture, including several ‘chromo domain-only’ proteins (top) and others with additional domains. Domains: SET, Su(var)3-9, Enhancer-of-zeste and Trithorax lysine methyltransferase domain; PHD, Plant Homeodomain; RING, Really Interesting New Gene; SANT, SWI3, ADA2, N-CoR and TFIIB DNA binding domain; ANK, ankyrin repeat; BRK, Brahma and Kismet; DEXDc, DEAD-like helicase; HELICc, helicase superfamily C-terminal domain; DUF, domain of unknown function; MOZ\_SAS, monocytic leukemic zinc finger – something about silencing histone acetyltransferase domain; CHD, chromodomain helicase DNA binding. (B) Multiple sequence alignment of chromo domains of CEC-1, CEC-3 and CEC-6 with *Drosophila polycomb* (*Dm\_Pc*) and the human chromobox (*Hs\_CBX*) proteins. Residue colouring: purple boxes, amino acids identical in all 8 sequences; yellow boxes and bold text, amino acids with similar properties in all 8 sequences; yellow boxes, bold and normal text, identical amino acids in 6/8 sequences.

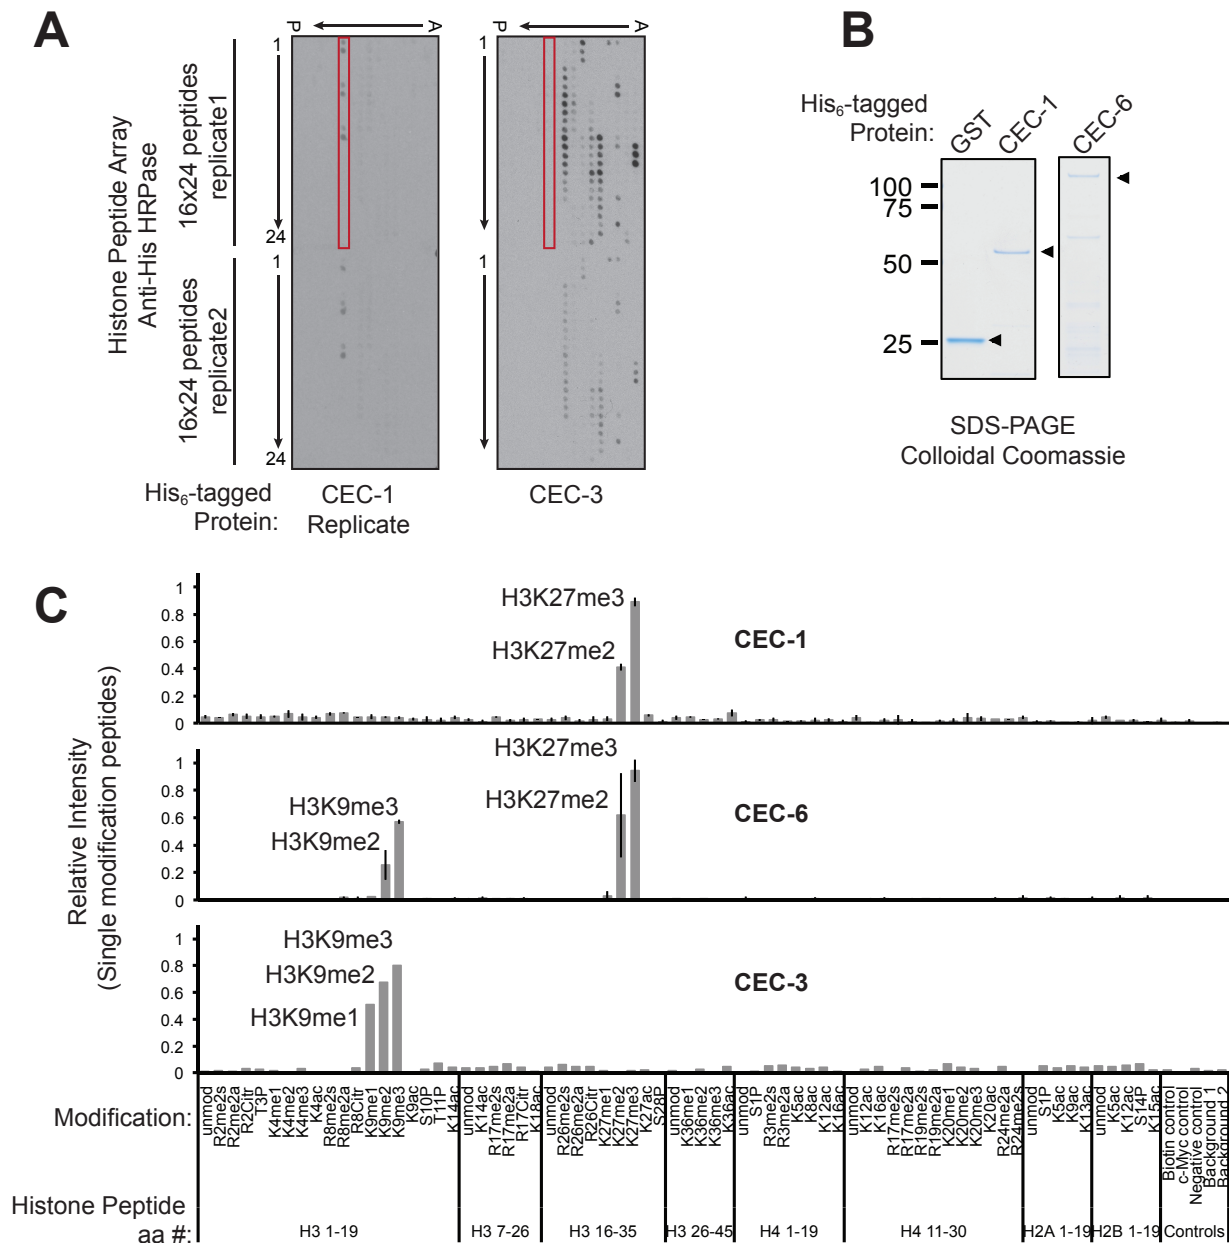

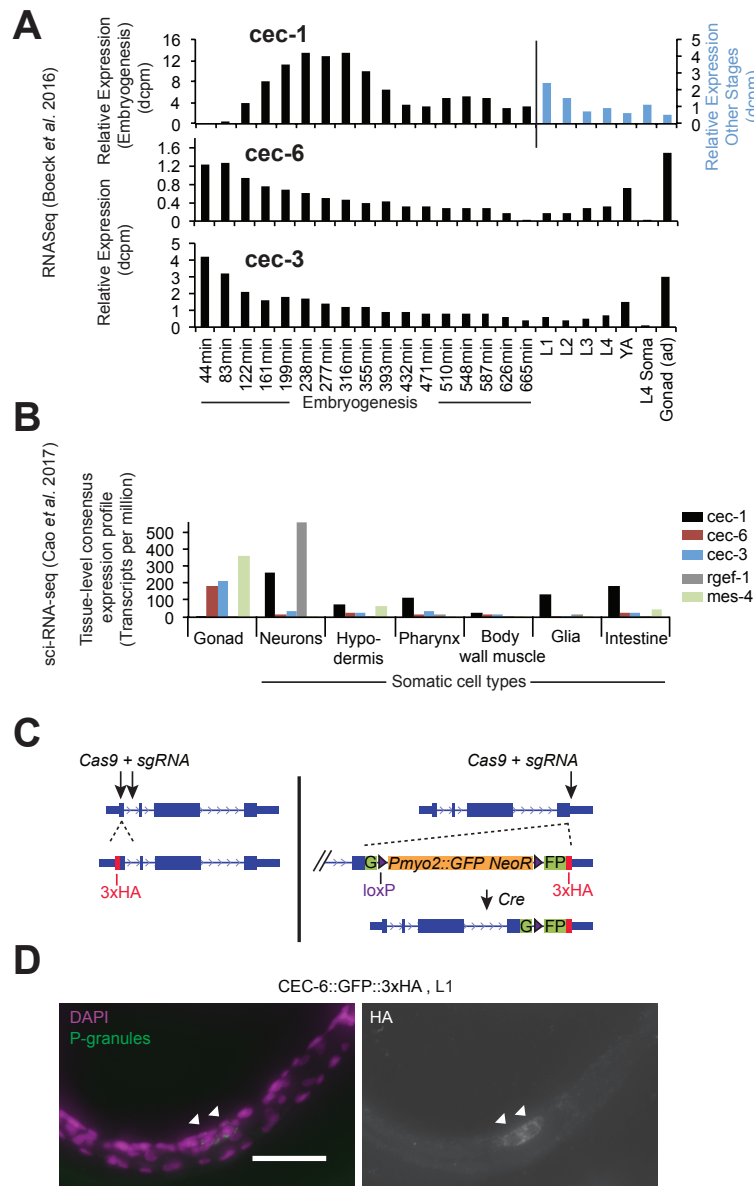

**Figure S3. Developmental and spatial expression patterns of *cec-1*, *cec-6* and *cec-3*.**

(A) Relative expression levels (dcpm, depth of coverage per base per million reads) from published RNA-Seq data (BOECK *et al.* 2016). Embryogenesis time course represents a unified average of 2-3 timepoint replicates. L1-L4, larval stages 1-4; YA, young adult; L4 Soma, L4 stage from *glp-1(q224)* mutant animals; Gonad (ad), germlines dissected from adult animals. (B) Relative expression levels (transcripts per million) in several cell types from published single-cell combinatorial indexing RNA sequencing (sci-RNA-seq) of L2 animals (CAO *et al.* 2017). *cec-6* and *cec-3* expression is enriched in the germline, whereas *cec-1* expression is enriched in somatic tissues. Representative germline-enriched (*mes-4*) and neuronal (*rgef-1*) transcripts are shown as specificity controls. (C) Scheme for generating knock-in epitope-tagged strains using CRISPR/Cas9 gene editing with (right) or without (left) a floxed selection cassette for pharyngeal GFP (*Pmyo2::GFP*) and G418 resistance (*NeoR*). (D) Expression of CEC-6::GFP::3xHA in the primordial germ cells (Z2 and Z3, arrowheads) of L1 animals. Z2 and Z3 are identified by immunofluorescence using anti-PGL-1 (P granule abnormality protein 1, DSHB mAb K76 (STROME and WOOD 1983) and CEC-6 is detected by anti-HA immunofluorescence. Scale bar, 20um.



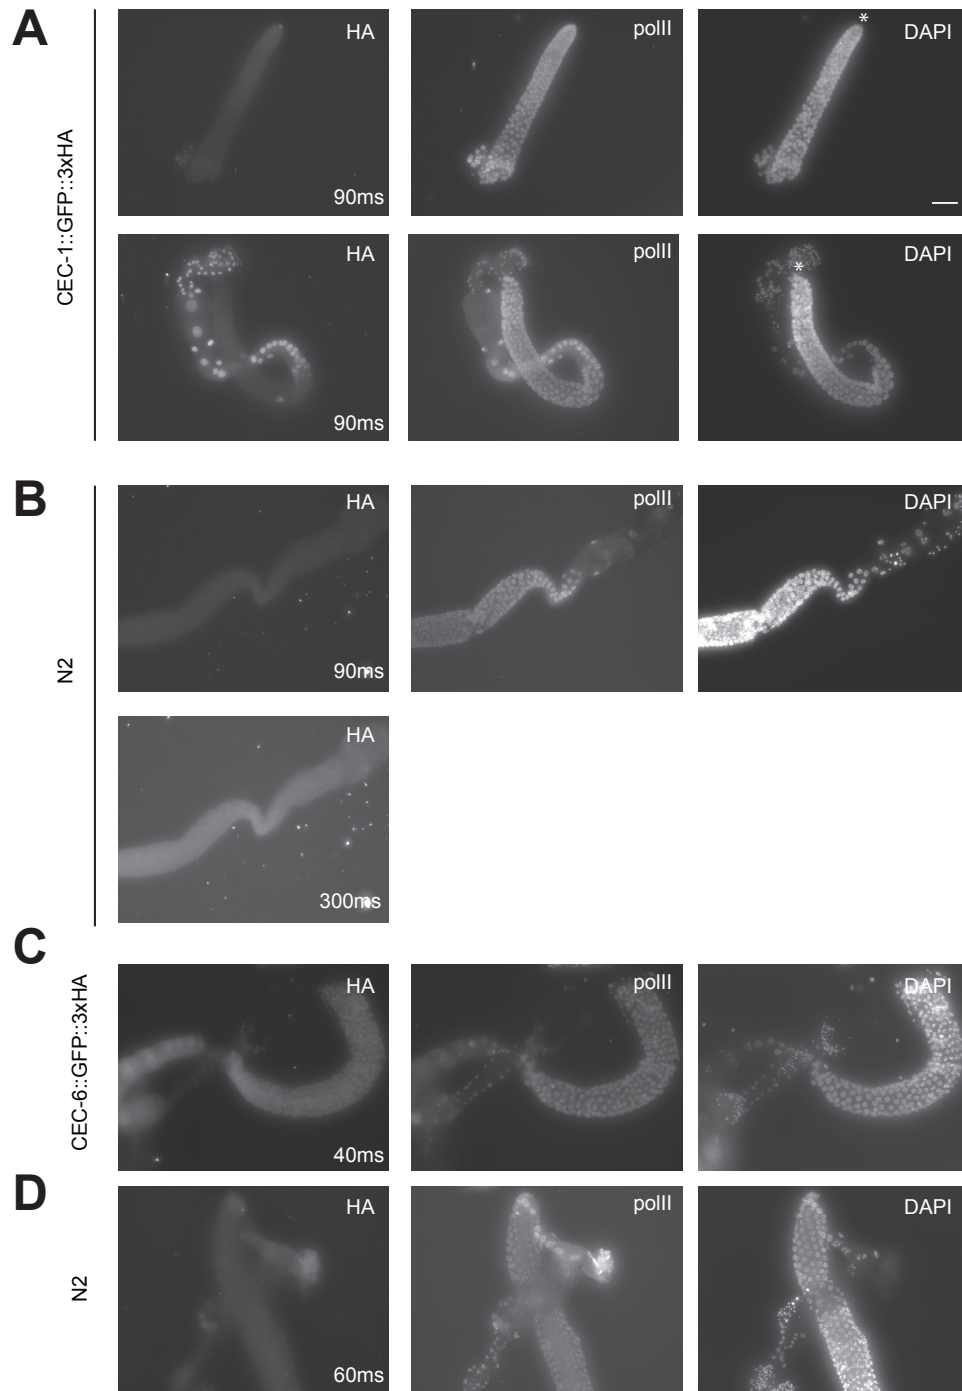

**Figure S4. Additional immunofluorescence of 3xHA-tagged CEC-1 and CEC-6 in dissected germlines.**

Images for anti-HA (left panels) and anti-RNA polymerase II C-terminal domain (polII) (middle panels) immunofluorescence or DAPI staining (right panels) in dissected germlines from transgenic knock-in animals (A, CEC-1::GFP::HA and B, CEC-6::GFP::HA) or non-transgenic animals (C, D N2) as a control. Exposure times are indicated for anti-HA immunofluorescence (left panels). As seen in Figure 2, CEC-1 is not detected in the distal germline (A, top row). Germlines were co-stained for polII to control for antibody penetration. Asterisks indicate the distal end of the germline, if present in the image. Scale bar, 20 microns.

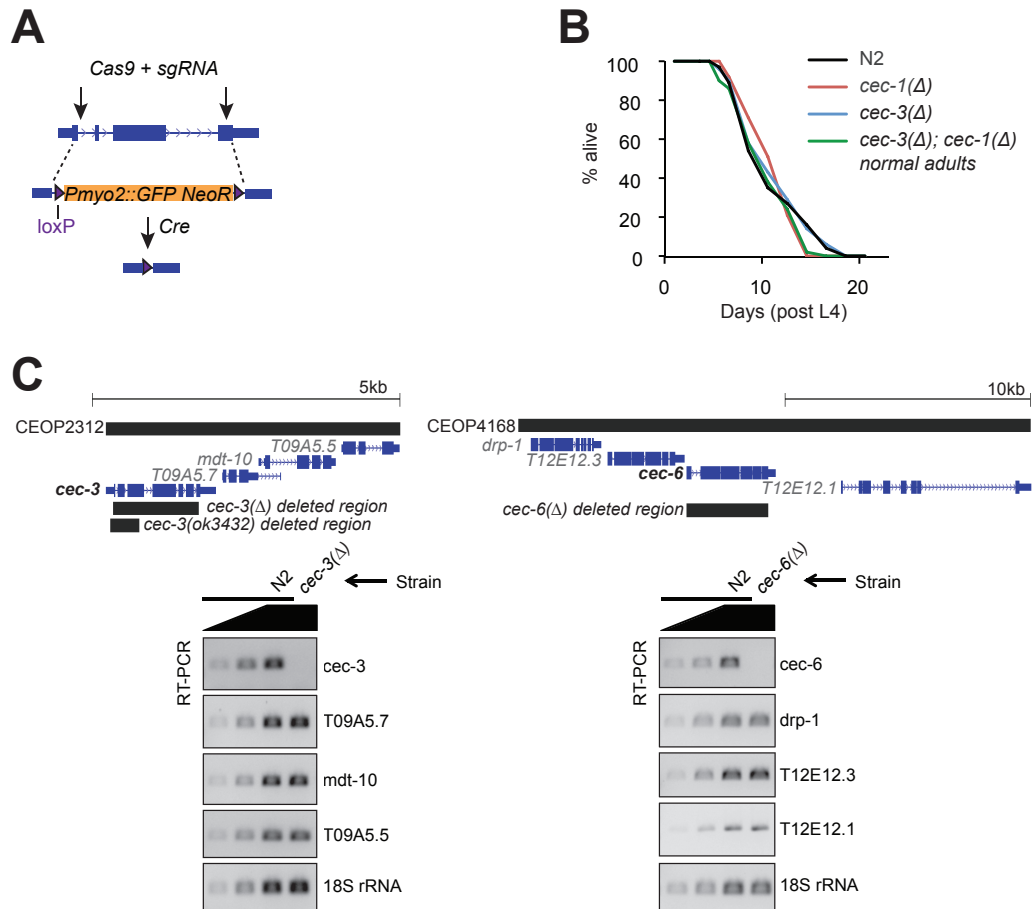

**Figure S5. Additional characterization of deletion strains.**

(A) Scheme for construction of gene deletions by CRISPR/Cas9. The gene body (from the start to the penultimate codon) was replaced by a floxed selection cassette encoding *Pmyo2::GFP* and *Prps27::NeoR*. The selection cassette was removed by injection of a plasmid encoding CRE recombinase. (B) Independent biological replicate for lifespan assay shown in Figure 4. Number of animals scored: N2, 81; *cec-1Δ*, 63; *cec-3Δ*, 88; *cec-3Δ; cec-1Δ*, 64. (C) Steady state mRNA levels of genes in an operon with *cec-3* (CEOP2312, left) or *cec-6* (CEOP4168, right) are not affected in the deletion strains. RT-PCR products were run on an agarose gel and stained with Ethidium Bromide.

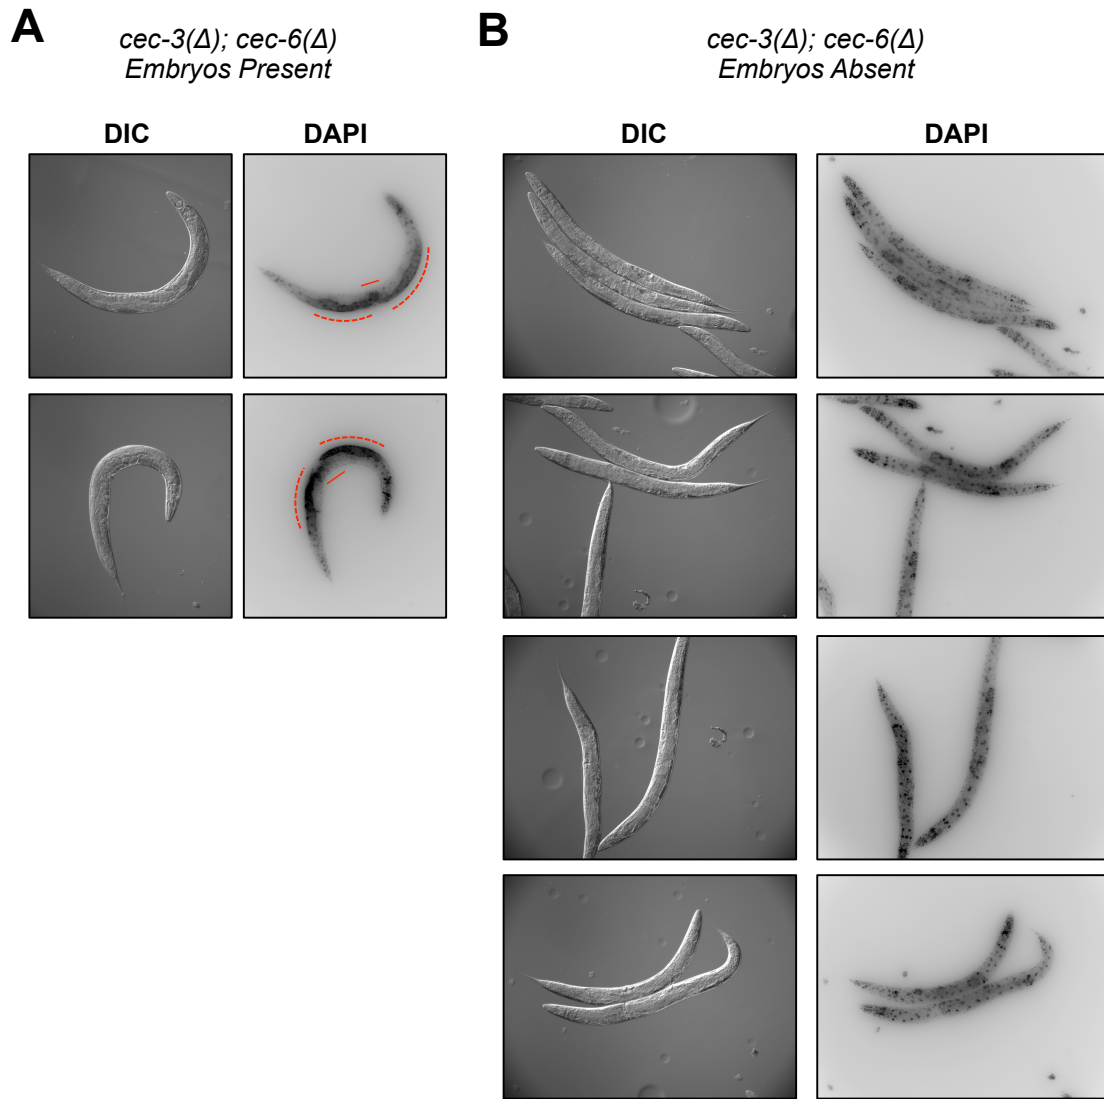

**Figure S6. Additional images of germline defects in sterile late-generation *cec-3Δ; cec-6Δ* animals.**

*cec-3Δ; cec-6Δ* adults were scored under the stereoscope based on whether they contained (A) or did not contain (B) embryos two days after L4. Animals were fixed and DAPI-stained. In panel A, dotted lines indicate the well-proliferated distal germline in fertile animals and solid lines indicate embryos in the uterus. Animals were picked at generation 33, corresponding to 9 generations before the sterility of this line, from the mortal germline assay in Figure 8A.

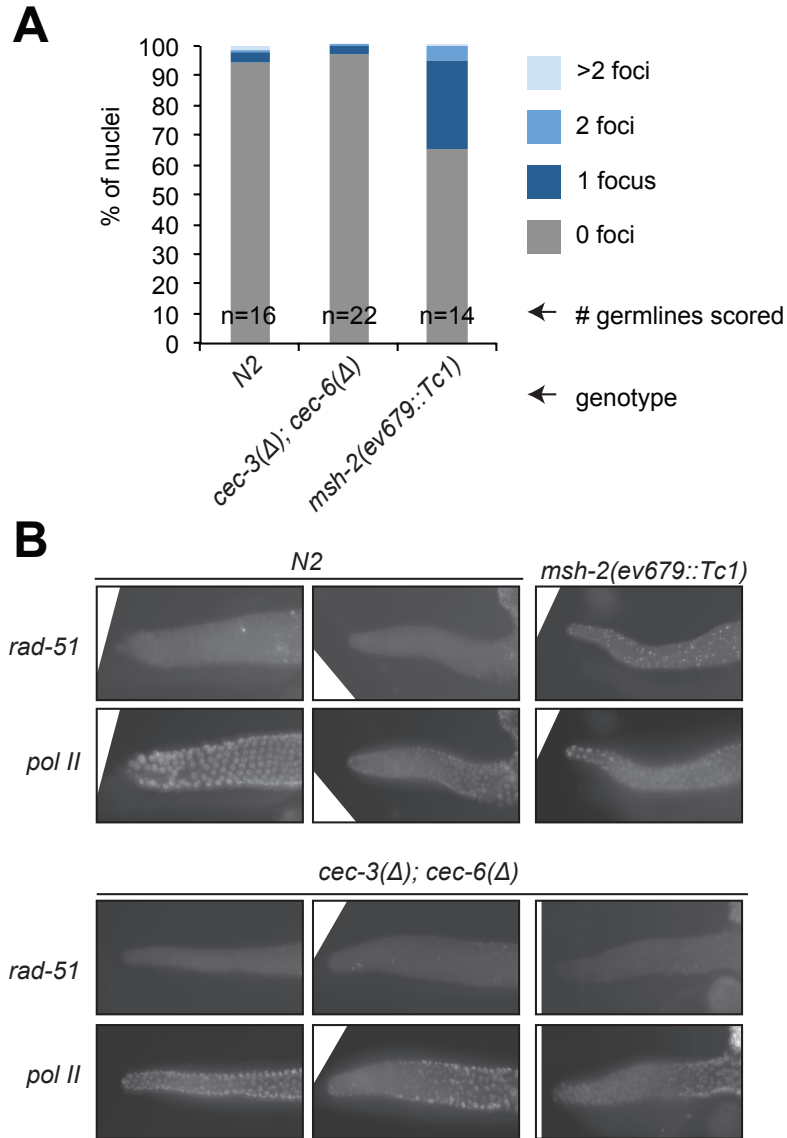

**Figure S7. *cec-3Δ;cec-6Δ* animals do not show increased RAD-51 foci in the mitotic region of the germline.**

Quantification (A) and representative images (B) of anti-RAD-51 immunofluorescence in dissected germlines from adult animals of the indicated genotypes. *pol II*, anti-RNA polymerase II Ser5P C-terminal domain. *msh-2* encodes a DNA repair protein and the *msh-2(ev679::Tc1)* mutant strain serves as a positive control. Quantification represents an average across three independent biological replicates.

## Supplemental Tables

**Table S1. Description of strains and alleles used in this study.**

| Strain          | Designation in paper                | Genotype                                                                          | Source and Notes<br>(see to Methods for details of strain construction)                                                                         |
|-----------------|-------------------------------------|-----------------------------------------------------------------------------------|-------------------------------------------------------------------------------------------------------------------------------------------------|
| N2 var. Bristol | N2                                  | Wild-type                                                                         | CGC                                                                                                                                             |
| RB1056          | <i>cec-1(ok1005)</i>                | <i>cec-1(ok1005) III</i>                                                          | CGC; backcrossed 4x to N2                                                                                                                       |
| VC2612          | <i>cec-3(ok3432)</i>                | <i>cec-3(ok3432) II</i>                                                           | CGC; backcrossed 4x to N2                                                                                                                       |
| ALS81           | <i>cec-3(ok3432); cec-1(ok1005)</i> | <i>cec-3(ok3432) II; cec-1(ok1005) III</i>                                        | Mating of backcrossed RB1056 and VC2612                                                                                                         |
| ALS25           | <i>3xHA::cec-1</i>                  | <i>cec-1(ele1[3xHA::cec-1]) III</i>                                               | This study; N-terminal knock-in of 3xHA tag using CRISPR                                                                                        |
| ALS138          | <i>cec-6::GFP::3xHA</i>             | <i>cec-6(ele14[cec-6::GFP::3xHA + loxP]) IV</i>                                   | This study; C-terminal knock-in of GFP::3xHA tag using CRISPR followed by selection cassette excision; loxP site is in the second intron of GFP |
| ALS140          | <i>cec-1::GFP::3xHA</i>             | <i>cec-1(ele16[cec-1::GFP::3xHA + loxP]) III</i>                                  | This study; as above                                                                                                                            |
| ALS99           | <i>cec-1(Pmyo2::GFP+)</i>           | <i>cec-1(ele2::loxP::Pmyo2::GFP-Prps-27::NeoR::loxP) III</i>                      | This study; CRISPR-mediated deletion/replacement of <i>cec-1</i> gene body with floxed selection cassette                                       |
| ALS130          | <i>cec-1Δ</i>                       | <i>cec-1(ele10::loxP+) III</i>                                                    | This study; CRE-mediated excision of selection cassette from ALS99                                                                              |
| ALS132          | <i>cec-6Δ</i>                       | <i>cec-6(ele12::loxP+) IV</i>                                                     | This study; Two-step CRISPR gene deletion/replacement and CRE excision                                                                          |
| ALS133          | <i>cec-3Δ</i>                       | <i>cec-3(ele13::loxP+) II</i>                                                     | This study; Two-step CRISPR gene deletion/replacement and CRE excision                                                                          |
| ALS147          | <i>cec-1Δ;cec-6Δ</i>                | <i>cec-1(ele10::loxP+) III; cec-6(ele12::loxP+) IV</i>                            | Mating of ALS130 and ALS132                                                                                                                     |
| ALS148          | <i>cec-3Δ;cec-1Δ</i>                | <i>cec-3(ele13::loxP+) II; cec-1(ele10::loxP+) III</i>                            | Mating of ALS130 and ALS133                                                                                                                     |
| ALS151          | <i>cec-3Δ;cec-6Δ</i>                | <i>cec-3(ele13::loxP+) II; cec-6(ele12::loxP+) IV</i>                             | Mating of ALS133 and ALS132                                                                                                                     |
| ALS196          | <i>Si[cec-1(+)];cec-3Δ;cec-1Δ</i>   | <i>eleSi8[cec-1(+) neoR] I; cec-3(ele13::loxP+) II; cec-1(ele10::loxP+) III</i>   | This study; MiniMos injection of ALS148                                                                                                         |
| ALS246          | <i>cec-3Δ; Si[cec-6(+)]; cec-6Δ</i> | <i>cec-3(ele13::loxP+) II; eleSi10[cec-6(+) neoR] III; cec-6(ele12::loxP+) IV</i> | This study; MiniMos injection of N2 followed by crossing to outcrossed <i>cec-3Δ;cec-6Δ</i> animals                                             |
| NW1613          | <i>msh-2(ev679::Tc1)</i>            | <i>msh-2(ev679::Tc1) I</i>                                                        | CGC; backcrossed 2x to N2                                                                                                                       |

**Table S2. Quantification of relative binding of CEC-1 and CEC-6 to histone peptide arrays.** For each of 384 peptide spots, the histone peptide amino acid range and combination of post-translational modifications are indicated. The raw intensity and calculated relative activity are also shown. (see Excel spreadsheet)

Supplemental Literature Cited

- BOECK, M. E., C. HUYNH, L. GEVIRTZMAN, O. A. THOMPSON, G. WANG *et al.*, 2016 The time-resolved transcriptome of *C. elegans*. *Genome Res* **26**: 1441-1450.
- CAO, J., J. S. PACKER, V. RAMANI, D. A. CUSANOVICH, C. HUYNH *et al.*, 2017 Comprehensive single-cell transcriptional profiling of a multicellular organism. *Science* **357**: 661-667.
- LETUNIC, I., and P. BORK, 2018 20 years of the SMART protein domain annotation resource. *Nucleic Acids Res* **46**: D493-D496.
- STROME, S., and W. B. WOOD, 1983 Generation of asymmetry and segregation of germ-line granules in early *C. elegans* embryos. *Cell* **35**: 15-25.
